# Supplementary material for: Fast response and multi-color photodetection in p-type Cu:CdS thin films
Source: Royal Society of Chemistry journal article supplement (doi:10.1039/d3ma00678f), 2024-01-01
Supplement: d3ma00678f1.pdf [file d3ma00678f1.pdf]

## Supplementary Information

### Fast response, multi-color photodetection in p-type Cu doped CdS thin films

Ganesha Krishna V S, Pawan Kumar, Gowrish Rao K, Mahesha M G\*

Manipal Institute of Technology, Manipal Academy of Higher Education, Manipal, Udupi, India 576104

\*corresponding author – [mahesha.mg@manipal.edu](mailto:mahesha.mg@manipal.edu)

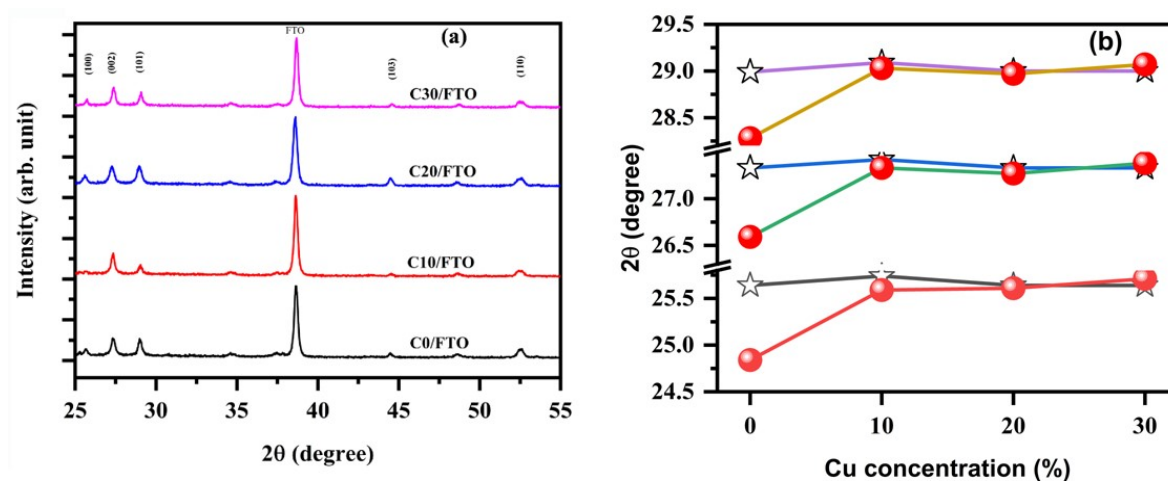

**Fig.S1:** a) XRD of CuCdS samples on FTO b) comparison of peak shifts between CuCdS samples on glass (star) and FTO (sphere)

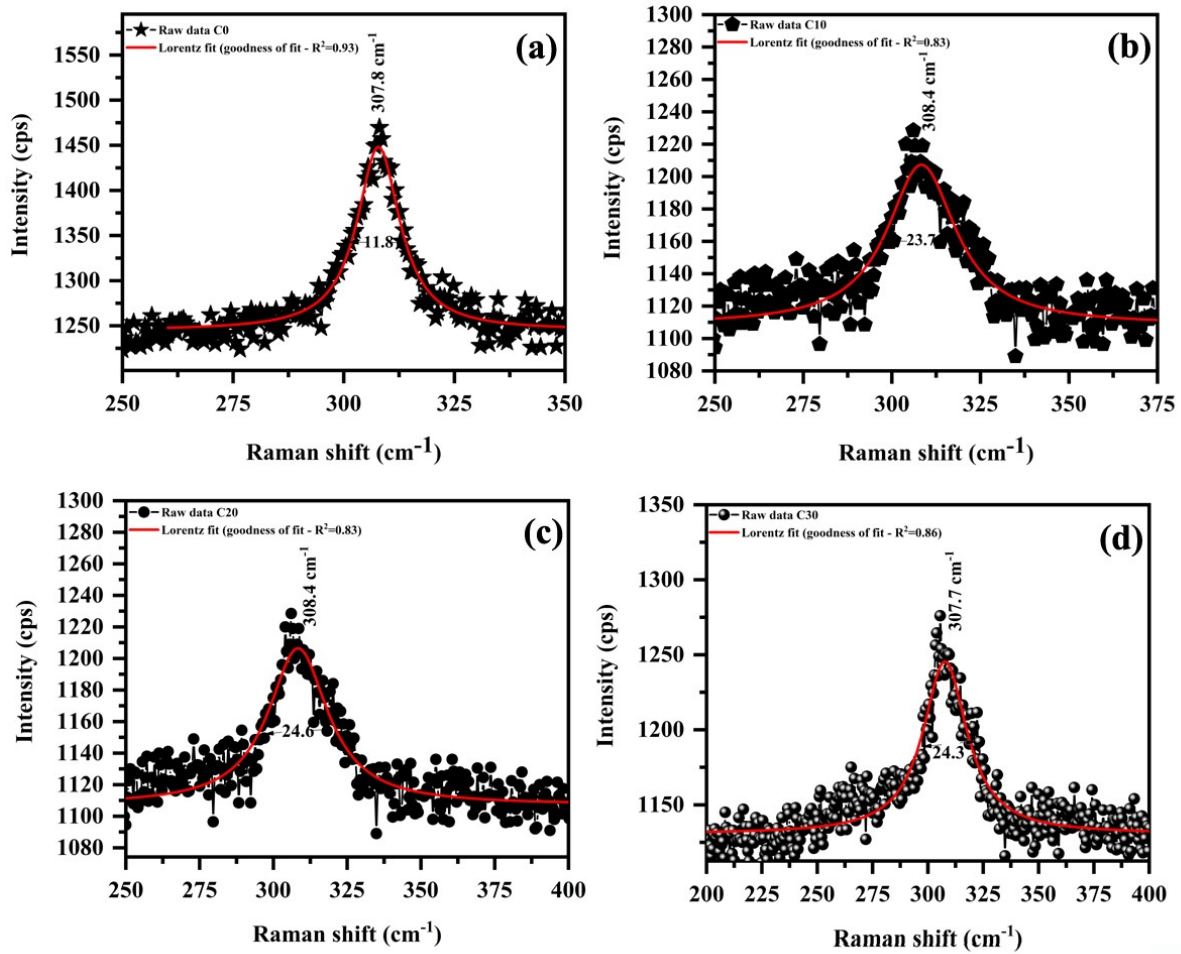

**Fig.S2:** Raman line fitting using Lorentzian function for CuCdS thin films with a) 0 at. % b) 10 at. % c) 20 at. % d) 30 at. % of Cu concentration

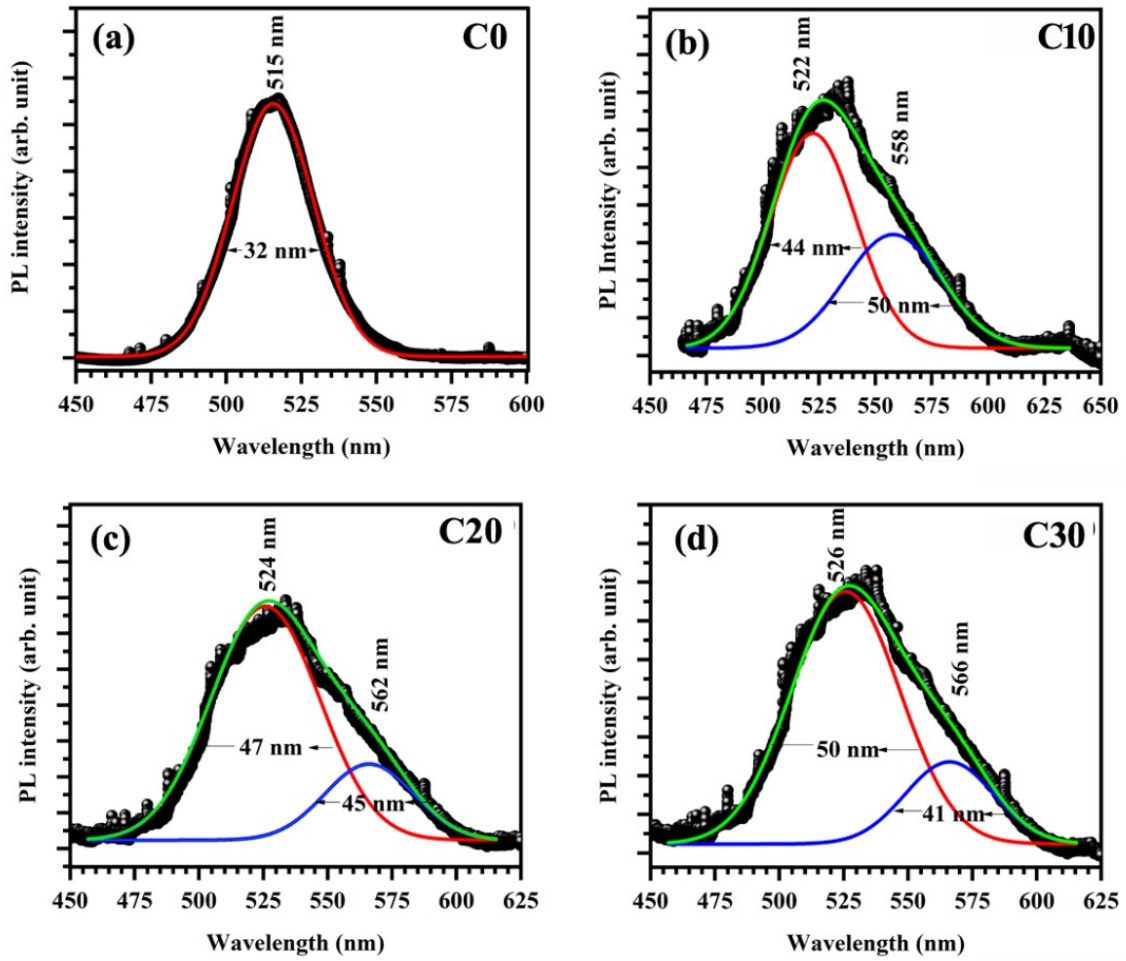

**Fig.S3:** Photoluminescence curve fitting using Gaussian function for CuCdS thin films with a) 0 at. % b) 10 at. % c) 20 at. % d) 30 at. % of Cu concentration

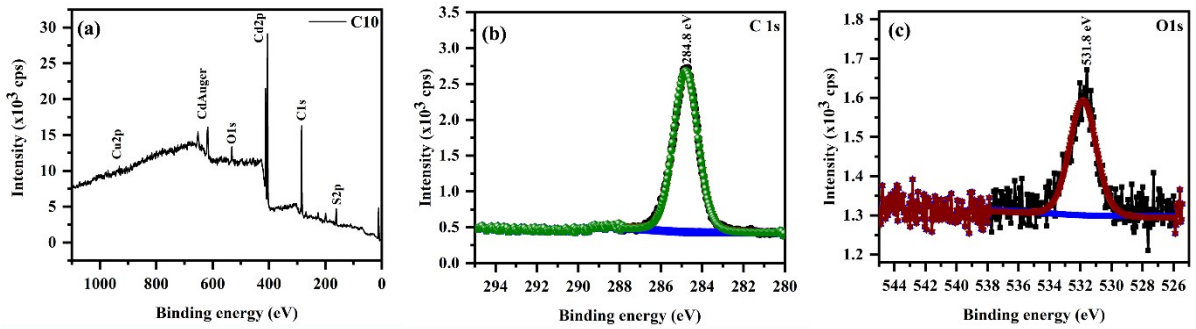

**Fig.S4:** a) XPS survey spectra b) C 1s curve fitting 284.8 eV c) O 1s curve fitting 531.8 eV

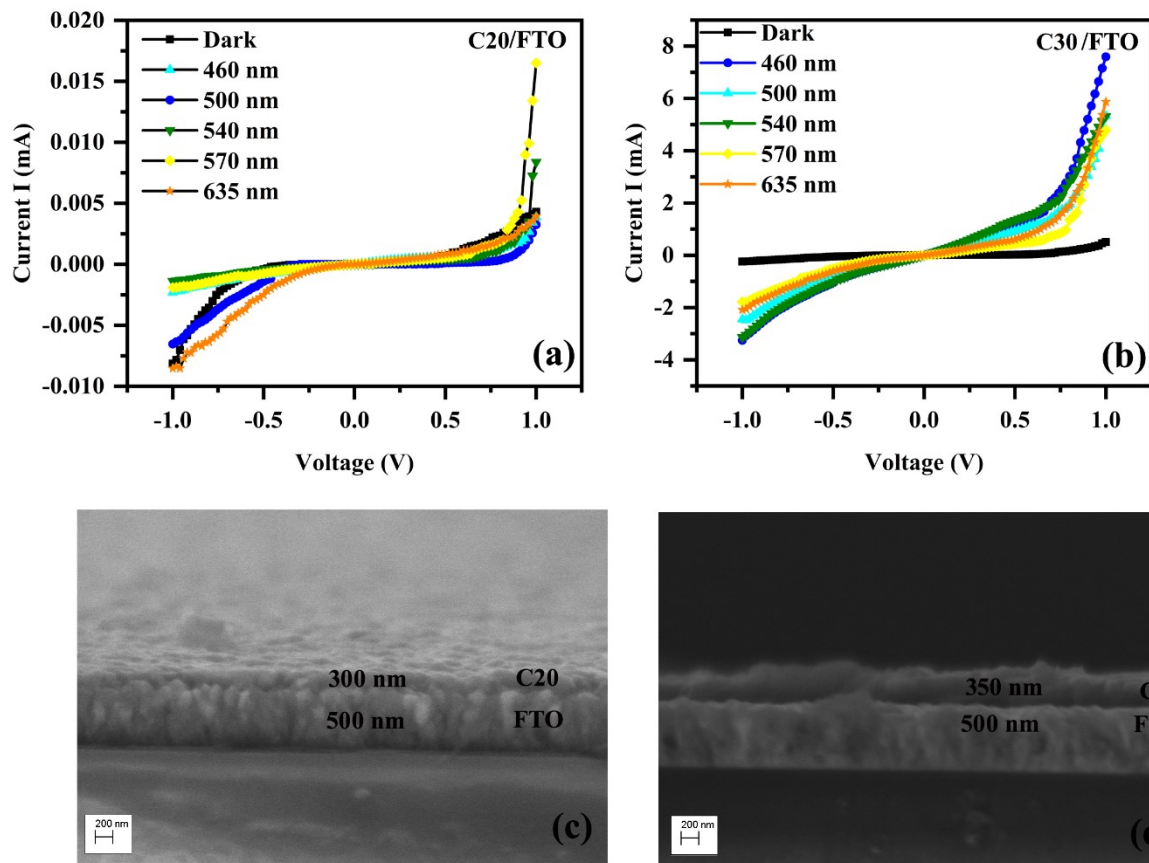

**Fig.S5:** I-V characteristic curves for a) C20/FTO b) C30/FTO at dark and various wavelengths c) and d) SEM cross-sectional images for C20 and C30 on FTO

**Tables:**

**Table T1:** XRD parameters extracted for CuCdS samples on FTO

| Sample  | Plane | 2 $\theta$ (degree) | FWHM (degree) | Crystallite size (nm) | Average D (nm) |
|---------|-------|---------------------|---------------|-----------------------|----------------|
| C0/FTO  | (100) | 24.84               | 0.63          | 13.5                  | 16.0           |
|         | (002) | 26.59               | 0.51          | 16.7                  |                |
|         | (101) | 28.28               | 0.48          | 17.8                  |                |
| C10/FTO | (100) | 25.59               | 0.52          | 16.3                  | 25.5           |
|         | (002) | 27.33               | 0.30          | 28.8                  |                |
|         | (101) | 29.03               | 0.27          | 31.5                  |                |
| C20/FTO | (100) | 25.61               | 0.32          | 26.8                  | 24.1           |
|         | (002) | 27.27               | 0.38          | 22.4                  |                |
|         | (101) | 28.97               | 0.37          | 23.1                  |                |

|         |       |       |      |      |      |
|---------|-------|-------|------|------|------|
| C30/FTO | (100) | 25.71 | 0.18 | 47.1 | 37.0 |
|         | (002) | 27.38 | 0.28 | 30.6 |      |
|         | (101) | 29.07 | 0.26 | 33.2 |      |

**Table T2:** XPS parameters from peak fitting (via CASAXPS) for Cu10 sample

| Element | Orbit n | j   | Binding energy | FWHM | Spin orbit splitting energy | Assignment |
|---------|---------|-----|----------------|------|-----------------------------|------------|
| Cd      | 3d      | 5/2 | 405.24         | 1.13 | 6.74                        | Cd-S       |
|         |         | 3/2 | 411.98         | 1.14 |                             |            |
| Cu      | 2p      | 1/2 | 949.33         | 4.42 | 19.8                        | Cu-S       |
|         |         | 3/2 | 929.53         | 3.68 |                             |            |
| S       | 2p      | 1/2 | 162.73         | 1.00 | 1.19                        | Cu-Cd-S    |
|         |         | 3/2 | 161.54         | 0.88 |                             |            |
| C       | 1s      | -   | 284.8          | 1.39 | -                           | C-O        |
| O       | 1s      | -   | 531.8          | 2.03 | -                           | C-O        |

**Table T3:** Comparison of various literatures on photodetector properties with current work

| Material   | Wavelength (nm) | Responsivity (A/W) | Rise time (ms) | Decay time (ms) | Detectivity (jones)   | Ref.         |
|------------|-----------------|--------------------|----------------|-----------------|-----------------------|--------------|
| Ag: CdS    | 551             | 0.43               | --             | --              | $2.58 \times 10^{11}$ | [33]         |
| Sm: CdS    | 532             | 1.101              | 157            | 166             | $2.21 \times 10^{12}$ | [11]         |
| Pr: CdS    | 532             | 2.71               | 90             | 170             | $6.94 \times 10^{11}$ | [31]         |
| Eu: CdS    | 532             | 0.614              | 85             | 106             | $1.38 \times 10^{12}$ | [32]         |
| Fe: CdS    | 532             | 0.55               | 100            | 200             | $9.05 \times 10^{10}$ | [36]         |
| Cl: CdS    | 530             | 1.67               | 3200           | 4120            | $1.08 \times 10^9$    | [21]         |
| Y: CdS     | 532             | 0.83               | 78             | 87              | $4.28 \times 10^{11}$ | [34]         |
| Al: CdS    | 532             | -                  | 500            | 600             | $9.29 \times 10^{11}$ | [38]         |
| CdS flakes | 400             | 0.18               | 14             | 8               | $2.71 \times 10^9$    | [37]         |
| CdS        | 532             | 0.43               | 200            | 300             | $8.46 \times 10^{10}$ | [3]          |
| Cu: CdS    | 500             | 0.2                | 11             | 21              | $1.26 \times 10^{11}$ | Present work |
